# Supplementary material
Source: Springer Nature journal article supplement (https://www.springermedizin.de/resource/supplementary/12911_2012_660_MOESM2_ESM.pdf/9526376)
Supplement: MOESM2 [file 9526376]

June 2009

April 2012

May 2014

project management

development and implementation of

**CDSS**

preparation and implementation of

**performance based incentives**

baseline analysis

Observation  
of interventions

intervention analysis

... policies/ guidelines

... quality of maternal care

... health economic cost

... provider motivation

... acceptance/ usability/ influence on workflow of CDSS

**Intervention**

**Evaluation: assessment of...**
